# Supplementary material for: IUSMMT: Survival mediation analysis of gene expression with multiple DNA methylation exposures and its application to cancers of TCGA
Source: PLoS Comput Biol. 2021 Aug 31;17(8):e1009250. doi: 10.1371/journal.pcbi.1009250 (PMC8437300; doi:10.1371/journal.pcbi.1009250)
Supplement: S4 Text — (DOCX) [file pcbi.1009250.s018.docx]

### S4 Text. Estimation of proportion parameters

The estimation of these proportion parameters required in can be easily implemented with methods that were well-established in the FDR literature [1-10]. Here, we estimate them with a simple non-parametric manner using in the calculation of q-values [6,8,9]. Let *κ*0+ be the null proportion of and *κ*+0 be the null proportion of ; then *κ*0+ and *κ*+0 can be conservatively estimated by

where *m* is the total number of analyzed genes, and λα and λβ are tuning parameters to determine whether an observed *P* value comes from the null case. In addition, *κ*00 is similarly estimated as

It needs to highlight that a value of λα or λβ that is much closer to one could lead to a higher confidence to guarantee the null of or . However, a larger λα or λβ would miss many and which actually come from the null distribution; in contrast, a smaller value of λα or λβ that is closer to zero has the risk of incorporating non-null or . Investigating the optimal value for λα or λβ is beyond the scope of our study. In the present study, for simplicity we employ λα = λβ = 0.5 following prior work [11]. Ultimately, it has

Once the estimates of these proportions are obtained, the estimated mixture null distribution for *P*max can be built to control FWER or FDR [11]. A comprehensive theoretical derivation with regards to the control of FWER or FDR can be conferred in [11]

### References

1. Jin J, Cai TT (2007) Estimating the Null and the Proportion of Nonnull Effects in Large-Scale Multiple Comparisons. J Am Stat Assoc 102: 495-506.

2. Jiang H, Doerge RW (2008) Estimating the proportion of true null hypotheses for multiple comparisons. Cancer Inform 6: 25-32.

3. Huang Y-T, Pan W-C (2016) Hypothesis test of mediation effect in causal mediation model with high-dimensional continuous mediators. Biometrics 72: 402-413.

4. Zhang H, Zheng Y, Zhang Z, Gao T, Joyce B, et al. (2016) Estimating and testing high-dimensional mediation effects in epigenetic studies. Bioinformatics 32: 3150-3154.

5. Efron B (2007) Size, power and false discovery rates. Ann Stat 35: 1351-1377.

6. Storey J (2003) The positive false discovery rate: a Bayesian interpretation and the q-value. Ann Stat 31: 2013 - 2035.

7. Efron B, Zhang NR (2011) False discovery rates and copy number variation. Biometrika 98: 251-271.

8. Storey J, Tibshirani R (2003) Statistical significance for genomewide studies. Proc Natl Acad Sci U S A 100: 9440 - 9445.

9. Storey J (2002) A direct approach to false discovery rates. J R Stat Soc Ser B 64: 479 - 498.

10. Efron B, Tibshirani R (2002) Empirical bayes methods and false discovery rates for microarrays. Genet Epidemiol 23: 70-86.

11. Dai JY, Stanford JL, LeBlanc M (2020) A Multiple-Testing Procedure for High-Dimensional Mediation Hypotheses. J Am Stat Assoc 10.1080/01621459.2020.1765785: 1-16.
